# Supplementary material for: COVID-19 in Slovenia, from a Success Story to Disaster: What Lessons Can Be Learned?
Source: Life (Basel). 2021 Oct 4;11(10):1045. doi: 10.3390/life11101045 (PMC8541564; doi:10.3390/life11101045)
Supplement: Supplementary file 1 [file life-11-01045-s001.zip]

Archive with 6 entries (6 files):
- Figure_S1.pdf
- S1_file.html
- S2_file.pdf
- S3_file.html
- Table_S1.html
- Table_S2.pdf
