# Supplementary material for: COVID-19 in Slovenia, from a Success Story to Disaster: What Lessons Can Be Learned?
Source: Life (Basel). 2021 Oct 4;11(10):1045. doi: 10.3390/life11101045 (PMC8541564; doi:10.3390/life11101045)
Supplement: Supplementary file 1 [file life-11-01045-s001.zip › Table_S2.pdf]

Table S2: Estimated number of cumulative deaths per 1 million inhabitants per 14-days (MF) and the largest number of patients treated in hospitals and ICUs during the second wave up to December 1, 2020 under counterfactual scenarios (1)-(7), see the paper for detailed description.

| Scenario                         |     | Deaths (cumulative) |           | Hospitals (day max) |              | ICU (day max) |            |
|----------------------------------|-----|---------------------|-----------|---------------------|--------------|---------------|------------|
| Mobility                         | C-T | Est.                | 90% CI    | Est.                | 90% CI       | Est.          | 90% CI     |
| (1) real                         | (a) | 54                  | [50-57]   | 1338                | [1256-1430]  | 223           | [212-234]  |
|                                  | (b) | 14                  | [12-16]   | 281                 | [245-322]    | 48            | [41-55]    |
| (2) pre-COVID                    | (a) | 439                 | [230-684] | 9654                | [3366-17871] | 1647          | [561-3066] |
|                                  | (b) | 278                 | [147-452] | 5260                | [2562-8664]  | 888           | [434-1461] |
| (3) stopped                      | (a) | 0.1                 | [0.1-0.2] | 6                   | [4-7]        | 1             | [1-1]      |
|                                  | (b) | 0.1                 | [0.1-0.2] | 6                   | [4-7]        | 1             | [1-1]      |
| (4) after LD<br>as first wave    | (a) | 37                  | [34-41]   | 983                 | [940-1029]   | 170           | [162-177]  |
|                                  | (b) | 13                  | [11-15]   | 281                 | [245-322]    | 48            | [41-55]    |
| (5) LD (expected)<br>on Sept 14  | (a) | 11                  | [7-16]    | 169                 | [113-271]    | 29            | [19-46]    |
|                                  | (b) | 9                   | [6-13]    | 169                 | [113-271]    | 29            | [19-46]    |
| (5.1) LD (instant)<br>on Sept 14 | (a) | 5                   | [4-7]     | 66                  | [62-70]      | 11            | [11-12]    |
|                                  | (b) | 4                   | [3-4]     | 66                  | [62-70]      | 11            | [11-12]    |
| (6) LD (expected)<br>on Aug 10   | (a) | 2                   | [1-2]     | 35                  | [28-46]      | 6             | [5-8]      |
|                                  | (b) | 2                   | [1-2]     | 35                  | [28-46]      | 6             | [5-8]      |
| (6.1) LD (instant)<br>on Aug 10  | (a) | 1                   | [1-1]     | 20                  | [19-21]      | 3             | [3-4]      |
|                                  | (b) | 1                   | [1-1]     | 20                  | [19-21]      | 3             | [3-4]      |
| (7) decreased<br>on Oct 1        | (a) | 7                   | [7-9]     | 160                 | [151-170]    | 27            | [26-29]    |
|                                  | (b) | 7                   | [6-7]     | 160                 | [152-169]    | 27            | [26-29]    |

(a) C-T stops on October 9 (as in reality); (b) C-T is performed throughout the period

C-T = contact tracing, LD = lockdown, Est. = estimate (posterior mode), CI = credible interval
